# Supplementary material for: Evaluation of the Oesophagogastric Cancer-Associated Microbiome: A Systematic Review and Quality Assessment
Source: MDPI journal article supplement (doi:10.3390/cancers15102668), 2023-05-09
Supplement: s1 [file s1]

**Table S1-1:** Study characteristics of articles reporting on the microbiome of gastric adenocarcinoma compared to a non-cancer group

| Author                   | Year | Country      | Specimen type        | Gastric adenocarcinoma |           |               | Control group | Control         |           |               | Microbiome assessment method  | MCC | No. of genera enriched (C/B/HC) | NAT | PPI | Abx |
|--------------------------|------|--------------|----------------------|------------------------|-----------|---------------|---------------|-----------------|-----------|---------------|-------------------------------|-----|---------------------------------|-----|-----|-----|
|                          |      |              |                      | No. of patients        | Age (yrs) | Gender (male) |               | No. of patients | Age (yrs) | Gender (male) |                               |     |                                 |     |     |     |
| <b>Sjostedt</b>          | 1985 | Sweden       | Saliva, OG fluid     | 10                     | -         | -             | B, HC         | 30, 30          | -         | -             | Culture                       | -   | 8/9/9                           | -   | No  | No  |
| <b>Dicksved</b>          | 2009 | Sweden       | Tissue               | 10                     | 71        | 8             | HC            | 5               | 73        | 3             | T-RFLP                        | -   | -                               | -   | -   | No  |
| <b>Seo</b>               | 2014 | Korea        | Tissue               | 16                     | 60        | 12            | AHT           | -               | -         | -             | RNA seq database              | -   | -                               | -   | -   | -   |
| <b>Aviles-Jimenez</b>    | 2014 | Mexico City  | Tissue               | 5                      | 71        | 1             | B             | 5               | 44        | 0             | 16S, microarray hybridization | Yes | 0/4/-                           | -   | No  | No  |
| <b>Eun</b>               | 2014 | Korea        | Tissue               | 11                     | 66        | 6             | B             | 10              | 50        | 4             | 16S V5, pyroseq               | -   | 2/0/-                           | -   | No  | No  |
| <b>Hu</b>                | 2015 | China        | Tongue coating       | 74                     | 57        | 37            | HC            | 72              | 55        | 35            | 16S V2-4, Illumina seq        | -   | 0/-/4                           | No  | -   | No  |
| <b>Wang</b>              | 2016 | China        | Tissue               | 103                    | -         | -             | B             | 212             | -         | -             | 16S V1-3, pyrosequencing      | -   | 3/0/-                           | -   | No  | No  |
| <b>Yu</b>                | 2017 | China/Mexico | Tissue               | 160                    | 63        | 109           | AHT           | -               | -         | -             | 16S V3-4, MiSeq               | -   | 5/-/0                           | No  | -   | -   |
| <b>Li</b>                | 2017 | Hong Kong    | Tissue               | 7                      | 53        | 5             | B, HC         | 9, 8            | 50, 49    | 2, 3          | 16S V3-4, Solexa Illumina seq | -   | 9/2/8                           | -   | No  | No  |
| <b>Castano-Rodriguez</b> | 2017 | Malaysia     | Tissue               | 12                     | 62        | 4             | B             | 20              | 50        | 11            | 16S, MiSeq                    | -   | 24/8/-                          | No  | No  | No  |
| <b>Ferreira</b>          | 2018 | Portugal     | Tissue               | 54                     | 59        | 32            | B             | 81              | 44        | 79            | 16S V5-6, NGS                 | Yes | 6/5/-                           | -   | No  | No  |
| <b>Sun</b>               | 2018 | China        | Saliva, SP           | 37                     | -         | -             | HC            | -               | -         | -             | 16S, MiSeq                    | Yes | 5/-/7                           | -   | -   | No  |
| <b>Hu</b>                | 2018 | China        | Gastric fluid        | 6                      | 61        | 5             | B             | 5               | 55        | 4             | Shotgun, HiSeq                | Yes | 4/4/-                           | No  | No  | No  |
| <b>Wu</b>                | 2018 | China        | Tongue coating       | 57                     | 59        | 40            | HC            | 80              | 55        | 50            | 16S V4, pyrosequencing        | Yes | 6/-/23                          | No  | No  | No  |
| <b>Hsieh</b>             | 2018 | Taiwan       | Tissue               | 11                     | 69        | 5             | B             | 9               | 32        | 3             | 16S V3-4, MiSeq               | -   | 3/0/-                           | -   | -   | -   |
| <b>Coker</b>             | 2018 | China        | Tissue               | 20                     | -         | -             | B             | 44              | -         | -             | 16S V4, N-W algorithm         | Yes | 6/2/-                           | No  | No  | No  |
| <b>Shao</b>              | 2019 | China        | Tissue               | 34                     | 62        | -             | AHT           | -               | -         | -             | 16S V4 + miniseq              | -   | 17/-/0                          | -   | -   | -   |
| <b>Gunathilake</b>       | 2019 | South Korea  | Tissue               | 268                    | 54        | 172           | HC            | 288             | 52        | 181           | 16S V3-4 + MiSeq              | Yes | 2/-/2                           | -   | -   | -   |
| <b>Liang</b>             | 2019 | China        | Faeces               | 20                     | 52        | -             | HC            | 22              | 53        | -             | 16S +MiSeq                    | -   | 3/-/1                           | No  | No  | No  |
| <b>Kageyama</b>          | 2019 | Japan        | Saliva               | 10                     | 71        | 6             | HC            | 118             | 66        | 84            | 16S V1-2 + Ion PGM Hi-Q Seq   | -   | -                               | No  | -   | No  |
| <b>Chen</b>              | 2019 | China        | Tissue               | 62                     | 60        | 46            | AHT           | -               | -         | -             | 16S V4-5 HiSeq                | Yes | 9/-/0                           | No  | No  | No  |
| <b>Dong</b>              | 2019 | China        | Serum                | 71                     | 59        | 60            | HC            | 13              | -         | -             | 16S V1-2 HiSeq                | Yes | 3/-/2                           | -   | No  | No  |
| <b>Liu</b>               | 2019 | China        | Tissue               | 276                    | 61        | 195           | AHT           | -               | -         | -             | 16S V3-4 MiSeq                | -   | 7/-/0                           | No  | No  | No  |
| <b>Qi</b>                | 2019 | China        | Faeces               | 116                    | 58        | 96            | HC            | 88              | 46        | 53            | 16S V3-4 MiSeq                | -   | 11/-/6                          | No  | -   | No  |
| <b>Wang</b>              | 2020 | China        | Tissue               | 29                     | 57        | 18            | B, HC         | 21, 30          | 45, 46    | 9, 15         | 16S V4 MiSeq                  | Yes | 5/4/2                           | No  | No  | No  |
| <b>Wang</b>              | 2020 | China        | Tissue               | 60                     | 60        | 44            | B             | 60              | 52        | 41            | 16S V3-4 HiSeq                | -   | 16/20/-                         | -   | No  | No  |
| <b>Spiegelhauer</b>      | 2020 | Denmark      | Tissue               | 12                     | 62        | 7             | B             | 22              | 48        | 4             | Culture + 16S V3-4 HiSeq      | Yes | 1/0/-                           | No  | No  | No  |
| <b>Gantuya</b>           | 2020 | Mongolia     | Tissue               | 48                     | -         | -             | B, HC         | 60, 20          | -         | -             | 16S V3-4 + MiSeq              | -   | 8/0/0                           | -   | No  | No  |
| <b>Wu</b>                | 2020 | China        | Tissue               | 18                     | 63        | 15            | B             | 32              | 62        | 24            | 16S + HiSeq                   | -   | 11/16/-                         | No  | No  | No  |
| <b>Xu</b>                | 2020 | China        | Tongue coating       | 181                    | 64        | 146           | HC            | 112             | 64        | 91            | 16S V3-4 + MiSeq              | Yes | 12/-/14                         | No  | No  | No  |
| <b>Dang</b>              | 2020 | China        | Tissue               | 30                     | -         | -             | B             | 17              | -         | -             | 16S V3-4 + MiSeq              | -   | 4/0/-                           | -   | -   | -   |
| <b>Park</b>              | 2021 | Korea        | Faeces, serum, urine | 181                    | 64        | 122           | HC            | 272             | 64        | 159           | 16S V3-4 + MiSeq              | Yes | 19/-/7                          | No  | No  | No  |
| <b>Pimentel-Nunes</b>    | 2021 | Portugal     | Tissue               | 31                     | 70        | 14            | B, HC         | 17              | 53        | 6             | 16S V1-8                      | -   | 2/0/0                           | -   | No  | -   |
| <b>Yu</b>                | 2021 | China        | Faeces               | 49                     | 62        | 31            | HC            | 49              | -         | -             | 16S V3-4 + TruSeq nano        | -   | 3/-/2                           | No  | -   | No  |
| <b>Yang</b>              | 2021 | USA          | Buccal               | 165                    | -         | -             | HC            | 323             | -         | -             | Shotgun                       | -   | 0/-/0                           | -   | -   | No  |

|                    |      |              |                              |     |    |     |       |          |        |         |                              |     |         |    |    |    |
|--------------------|------|--------------|------------------------------|-----|----|-----|-------|----------|--------|---------|------------------------------|-----|---------|----|----|----|
| <b>Dai</b>         | 2021 | China        | Tissue                       | 37  | 66 | 26  | AHT   | -        | -      | -       | 16S V3-4 + Ion plus fragment | Yes | 10/-/-  | -  | -  | -  |
| <b>Li</b>          | 2021 | China        | Tissue                       | 27  | 63 | 17  | B     | 36       | 46     | 11      | 16S V3-4 + MiSeq             | -   | 36/28/- | -  | No | No |
| <b>Gunathilake</b> | 2021 | Korea        | Tissue                       | 268 | 54 | 172 | HC    | 288      | 52     | 181     | 16S V4 + MiSeq               | Yes | 0/-/0   | -  | -  | -  |
| <b>Huang</b>       | 2021 | China        | Saliva                       | 99  | 50 | 64  | B     | 101      | 48     | 51      | 16S V3-4 + MiSeq             | Yes | 2/2/-   | No | No | No |
| <b>Oliveira</b>    | 2021 | North Brazil | Saliva, dental plaque        | 192 | 53 | 119 | HC    | 192      | 51     | 119     | qPCR                         | -   | 0/-/0   | No | -  | No |
| <b>Sarhadi</b>     | 2021 | Finland      | Faeces                       | 29  | -  | 14  | HC    | 13       | -      | 3       | 16S V2-4, V6-9 + Ion Chip    | Yes | 0/-/5   | No | -  | No |
| <b>Zhang</b>       | 2021 | China        | Tissue                       | 20  | -  | -   | B     | 17       | 56     | -       | 16S V3-4 + MiSeq             | -   | 11/13/- | -  | -  | -  |
| <b>Liu</b>         | 2021 | China        | Faeces                       | 38  | -  | -   | HC    | 35       | -      | -       | 16S V3-4 + 454 GS-FLX        | -   | 13/-/2  | -  | -  | -  |
| <b>Zhang Y</b>     | 2021 | China        | Faeces                       | 83  | 61 | 56  | B, HC | 54, 61   | 55, 54 | 27, 33  | 16S V4 + HiSeq               | -   | 28/2/0  | No | No | No |
| <b>Abate</b>       | 2022 |              | FFPE tissue                  | 520 | -  | 342 | AHT   | -        | -      | -       | MSKCC and TCGA               | Yes | 16/-/-  | -  | -  | -  |
| <b>Liu</b>         | 2022 | China        | Tissue                       | 438 | 61 | 200 | B, HC | 318, 109 | 50, 46 | 151, 56 | 10 public datasets 16S       | Yes | 22/0/0  | -  | No | No |
| <b>Zhang C</b>     | 2022 | China        | Faeces, tissue, oral mucosal | 76  | 64 | 51  | HC    | 70       | 61     | 36      | 16S V4 + Novoseq/MiSeq       | Yes | 5/-/3   | No | -  | No |
| <b>He</b>          | 2022 | China        | Tissue, gastric juice        | 64  | -  | -   | B     | 61       | -      | -       | 16S V4 + MiSeq               | -   | 15/12/- | -  | No | No |
| <b>Ding</b>        | 2022 | China        | Faeces, gastric juice        | 40  | -  | 30  | HC    | 10       | -      | -       | 16S V4 + NovoSeq             | -   | 7/-/3   | -  | -  | No |
| <b>Park</b>        | 2022 | China        | Gastric juice                | 56  | 60 | 39  | B     | 16       | 60     | 6       | 16S V3-4 + MiSeq             | Yes | 3/4/-   | -  | -  | No |
| <b>Zhou</b>        | 2022 | China        | Tissue, faeces               | 25  | 62 | 14  | B     | 25       | 59     | 15      | 16S V3-4 + MiSeq             | -   | 2/0/-   | No | No | No |
| <b>Sun</b>         | 2022 | China        | Tissue                       | 13  | 72 | 5   | B     | 65       | -      | 32      | 16S V3-4                     | Yes | 3/0/-   | No | No | No |
| <b>Png</b>         | 2022 | Singapore    | Tissue                       | 4   | -  | -   | B     | 17       | -      | -       | 16S V3-4 + MiSeq             | Yes | 4/1/-   | -  | -  | -  |
| <b>Shu</b>         | 2022 | China        | Saliva                       | 33  | -  | -   | HC    | 34       | -      | -       | 16S V3-4 + Ion S5™ XL        | -   | 2/-/3   | No | -  | No |
| <b>Zhang Z</b>     | 2022 | China        | Faecal                       | 20  | 61 | 15  | HC    | 30       | 59     | 15      | 16S V3-4 + MiSeq             | -   | 2/-/1   | No | No | No |
| <b>Shi</b>         | 2022 | China        | Tissue                       | 10  | -  | 10  | AHT   | -        | -      | -       | 16S V3-4 + MiSeq             | -   | 7/-/-   | No | -  | No |

OG, oesophagogastric. SP, Subgingival plaque. B, benign, HC, healthy control. AHT, adjacent healthy tissue. 16S, 16S rRNA. N-W, Needleman-Wunsch. MCC, multiple comparisons correction. NAT, neoadjuvant therapy. PPI, proton pump inhibitor therapy. Abx, Antibiotic therapy. Y, yes. N, no.

**Table S1-2:** Study characteristics of articles reporting on the microbiome of oesophageal adenocarcinoma compared to a non-cancer group

| Author   | Year | Country   | Specimen type   | Histological subtype | Oesophageal carcinoma |           |               | Control group | Control         |           |               | Microbiome assessment method | MCC | No. of genera enriched (C/B/HC) | NAT   | PPI   | Abx |
|----------|------|-----------|-----------------|----------------------|-----------------------|-----------|---------------|---------------|-----------------|-----------|---------------|------------------------------|-----|---------------------------------|-------|-------|-----|
|          |      |           |                 |                      | No. of patients       | Age (yrs) | Gender (male) |               | No. of patients | Age (yrs) | Gender (male) |                              |     |                                 |       |       |     |
| Yamamura | 2016 | Japan     | Tissue          | Adeno                | 300                   | 66        | 287           | HC            | -               | -         | -             | qPCR                         | -   | 0/-/7                           | No    | -     | No  |
| Elliott  | 2017 | UK        | Tissue          | Adeno                | 19                    | 70        | 15            | HC            | 20              | 57        | 7             | 16S V1-2 + MiSeq             | Yes | 0/-/0                           | Mixed | -     | -   |
| Peters   | 2017 | USA       | Mouthwash       | Adeno                | 81                    | 68        | 75            | HC            | 210             | 68        | 168           | 16S V4 + MiSeq               | -   | 1/-/4                           | -     | -     | -   |
| Kageyama | 2019 | Japan     | Saliva          | Unspecified          | 12                    | 68        | 8             | HC            | 118             | 66        | 84            | 16S V1-2 + Ion PGM           | -   | 0/-/0                           | No    | -     | No  |
| Yuda     | 2020 | Japan     | Saliva          | Adeno                | 78                    | 64        | 572           | -             | -               | -         | -             | Hi-Q Seq                     | -   | 0/-/-                           | Mixed | -     | No  |
| Peter    | 2020 | USA       | Tissue          | Adeno                | 10                    | 65        | 9             | HC            | 10              | 52        | 6             | 16S V4 + Miseq               | Yes | 0/-/3                           | -     | Mixed | No  |
| Li       | 2020 | China     | Tissue          | Adeno                | 11                    | 61        | 8             | HC            | 16              | 59        | 10            | 16S V3-4 + Miseq             | -   | 11/-/8                          | No    | -     | No  |
| Zhou     | 2020 | Australia | Tissue          | Adeno                | 6                     | 67        | 6             | B, HC         | 31, 16          | -, 52     | -, 2          | 16S V1-3 + Miseq             | -   | 3/4/3                           | No    | -     | No  |
| Lopetsu  | 2020 | Italy     | Tissue          | Adeno                | 6                     | 56        | 4             | HC            | 10              | 52        | 6             | 16S V3-4 + Miseq             | -   | 5/-/3                           | No    | N     | No  |
| Kawasaki | 2020 | Japan     | SP              | Adeno                | 3                     | 66        | 47            | HC            | 62              | 70        | 50            | RT-PCR                       | -   | 0/-/0                           | No    | -     | No  |
| Ishaq    | 2021 | China     | Faeces          | Adeno                | 4                     | -         | -             | HC            | 20              | -         | 6             | 16S V3-4 + Hiseq, qPCR       | -   | 2/-/2                           | -     | -     | No  |
| Wang     | 2021 | -         | Tissue          | Adeno                | 20                    | 73        | 15            | AHT           | -               | -         | -             | TCMA database                | Yes | 0/-/-                           | -     | -     | -   |
| Deng     | 2021 | China     | Faeces          | Adeno                | 2                     | -         | -             | HC            | 23              | 64        | 4             | 16S V4 + Miseq               | -   | 11/-/10                         | No    | No    | No  |
| Hao      | 2022 | USA       | Tissue, OM swab | Adeno                | 19                    | 60        | 18            | B, HC         | 27              | 56        | 17            | -                            | Yes | 31/0/2                          | -     | -     | No  |

OM, oral mucosa. SP, Subgingival plaque. SCC, squamous cell carcinoma. Adeno, adenocarcinoma. B, benign, HC, healthy control. 16S, 16S rRNA. MCC, multiple comparisons correction. NAT, neoadjuvant therapy. PPI, proton pump inhibitor therapy. Abx, Antibiotic therapy. Y, yes. N, no.

**Table S1-3:** Study characteristics of articles reporting on the microbiome of oesophageal squamous cell carcinoma compared to a non-cancer group

| Author         | Year | Country   | Specimen type  | Histological subtype | Oesophageal carcinoma |           |               | Control group | Control         |           |               | Microbiome assessment method | MCC | No. of genera enriched (C/B/HC) | NAT   | PPI | Abx |
|----------------|------|-----------|----------------|----------------------|-----------------------|-----------|---------------|---------------|-----------------|-----------|---------------|------------------------------|-----|---------------------------------|-------|-----|-----|
|                |      |           |                |                      | No. of patients       | Age (yrs) | Gender (male) |               | No. of patients | Age (yrs) | Gender (male) |                              |     |                                 |       |     |     |
| Chen           | 2015 | China     | Saliva         | SCC                  | 87                    | 65        | 59            | HC            | 85              | 66        | 62            | 16S V3-4 + pyrosequencing    | -   | 7/-/26                          | No    | -   | No  |
| Nasrollahzadeh | 2015 | Iran      | Tissue         | SCC                  | 37                    | 65        | 18            | B, HC         | 17, 37          | 64, 62    | 16, 18        | 16S V3-4 + GS-FLX            | Yes | 0/0/0                           | -     | -   | -   |
| Yamamura       | 2016 | Japan     | Tissue         | SCC                  | 12                    | 66        | 287           | HC            | -               | -         | -             | qPCR                         | -   | 0/-/7                           | No    | -   | No  |
| Shao           | 2019 | China     | Tissue         | SCC                  | 61                    | 62        | -             | -             | -               | -         | -             | 16S V4 + miniSeq             | -   | 2/-/-                           | -     | -   | -   |
| Kageyama       | 2019 | Japan     | Saliva         | Unspecified          | 12                    | 68        | 8             | HC            | 118             | 66        | 84            | 16S V1-2 + Ion PGM Hi-Q Seq  | -   | 0/-/0                           | No    | -   | No  |
| Wang           | 2019 | China     | Saliva         | SCC                  | 20                    | 66        | 14            | HC            | 21              | 65        | 12            | 16S V3-4 + MiSeq             | -   | 3/-/2                           | No    | -   | No  |
| Yamamura       | 2019 | Japan     | Tissue         | SCC                  | 551                   | 66        | 459           | -             | -               | -         | -             | qPCR                         | -   | 0/-/-                           | Mixed | -   | -   |
| Xu             | 2020 | China     | OM swab        | SCC                  | 31                    | -         | 24            | -             | -               | -         | -             | 16S V3-4 + Ion S5 TM XL      | -   | 3/-/-                           | Yes   | -   | No  |
| Yuda           | 2020 | Japan     | Saliva         | SCC                  | 567                   | 64        | 572           | -             | -               | -         | -             | Culture                      | -   | 0/-/-                           | Mixed | -   | No  |
| Li             | 2020 | China     | Tissue         | SCC                  | 17                    | 61        | 12            | HC            | 16              | 59        | 10            | 16S V3-4 + Miseq             | -   | 11/-/8                          | No    | -   | No  |
| Zhao           | 2020 | China     | Saliva         | SCC                  | 39                    | 60        | 23            | HC            | 51              | 49        | 23            | 16S V3-4 + Miseq             | Yes | 24/-/11                         | No    | -   | No  |
| Kawasaki       | 2020 | Japan     | SP             | SCC                  | 58                    | 66        | 47            | HC            | 62              | 70        | 50            | RT-PCR                       | -   | 0/-/0                           | No    | -   | No  |
| Li Z           | 2021 | China     | Tissue         | SCC                  | 111                   | 63        | 64            | -             | -               | -         | -             | 16S V3-4 + Miseq, qPCR       | -   | 3/-/-                           | -     | -   | -   |
| Li Z           | 2021 | China     | Saliva, tissue | SCC                  | 70                    | 64        | 46            | HC            | 82              | 59        | 48            | 16S V4 + Ion S5™ XL          | Yes | 22/-/-                          | -     | No  | No  |
| Wei            | 2021 | China     | Saliva         | SCC                  | 90                    | 62        | 71            | HC            | 50              | 44        | 27            | 16S V4 + Hiseq               | -   | 4/-/-                           | -     | No  | No  |
| Ishaq          | 2021 | China     | Faeces         | SCC                  | 11                    | -         | -             | HC            | 20              | -         | 6             | 16S V3-4 + Hiseq, qPCR       | -   | 0/-/2                           | -     | -   | No  |
| Jiang          | 2021 | China     | Tissue         | SCC                  | 32                    | 56        | 20            | B, HC         | 15, 21          | 56, 48    | 9, 13         | 16S V3-4                     | -   | 5/3/8                           | No    | No  | No  |
| Wang           | 2021 | -         | Tissue         | SCC                  | 40                    | 60        | 36            | -             | -               | -         | -             | TCMA database                | Yes | 0/-/-                           | -     | -   | -   |
| Shen           | 2021 | China     | Tissue         | SCC                  | 21                    | 66        | 18            | HC            | 17              | 64        | 15            | 16S + qPCR                   | -   | 3/-/0                           | -     | -   | -   |
| Chen           | 2021 | China     | OM swab        | SCC                  | 156                   | -         | -             | -             | -               | -         | -             | 16S V3-4                     | -   | 0/-/-                           | -     | -   | -   |
| Kovaleva       | 2021 | Russia    | FFPE tissue    | SCC                  | 48                    | 61        | 36            | -             | -               | -         | -             | 16S V3-4 + qPCR              | -   | 1/-/-                           | -     | -   | -   |
| Yang           | 2021 | China     | Tissue         | SCC                  | 38                    | 62        | 27            | HC            | 15              | 48        | 9             | 16S V4                       | Yes | 15/-/8                          | -     | No  | No  |
| Deng           | 2021 | China     | Faeces         | SCC                  | 18                    | 66        | 4             | HC            | 23              | 64        | 4             | 16S V4 + Miseq               | -   | 0/-/9                           | No    | No  | No  |
| Cheung         | 2022 | Hong Kong | Faeces         | SCC                  | 15                    | 69        | 15            | HC            | 16              | 60        | 16            | 16S V4 + Miseq               | -   | 6/-/4                           | No    | No  | No  |
| Wu             | 2022 | China     | Faeces         | SCC                  | 40                    | 46        | 26            | HC            | 40              | 46        | 25            | -                            | -   | 1/-/2                           | No    | No  | No  |
| Lin            | 2022 | China     | Tissue         | SCC                  | 120                   | 61        | 89            | -             | -               | -         | -             | 16S V3-4 + Hiseq             | Yes | 2/-/-                           | No    | No  | No  |
| Shen           | 2022 | China     | Tissue         | SCC                  | 19                    | -         | 12            | -             | -               | -         | -             | 16S V1-9 + Miseq             | -   | 5/-/-                           | No    | -   | -   |

OM, oral mucosa. SP, Subgingival plaque. FFPE, Formalin fixed paraffin embedded. SCC, squamous cell carcinoma. Adeno, adenocarcinoma. B, benign, HC, healthy control. 16S, 16S rRNA. MCC, multiple comparisons correction. NAT, neoadjuvant therapy. PPI, proton pump inhibitor therapy. Abx, Antibiotic therapy. Y, yes. N, no.
